# Supplementary material for: The Lifespan Extension Ability of Nicotinic Acid Depends on Whether the Intracellular NAD+ Level Is Lower than the Sirtuin-Saturating Concentrations
Source: Int J Mol Sci. 2019 Dec 24;21(1):142. doi: 10.3390/ijms21010142 (PMC6982340; doi:10.3390/ijms21010142)
Supplement: Supplementary file 1 [file ijms-21-00142-s001.pdf]

## Supplementary Materials:

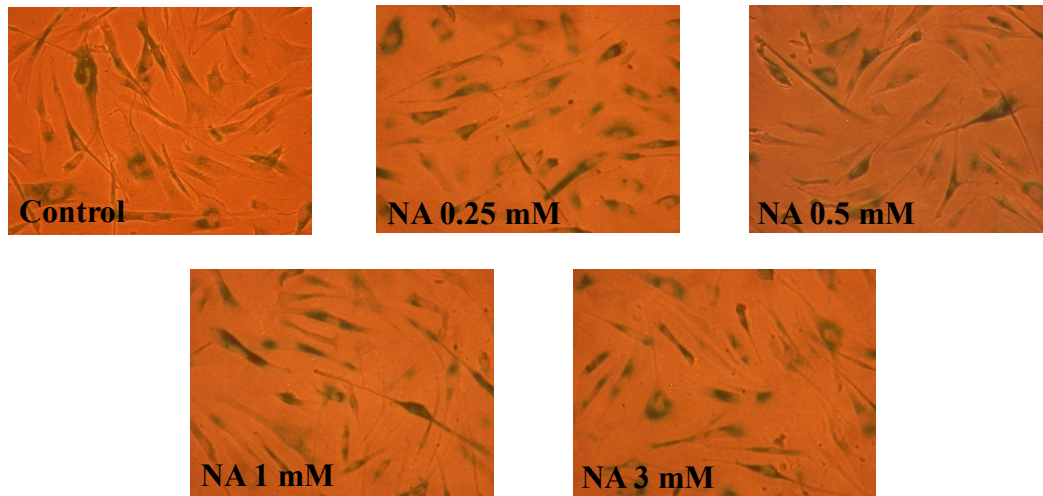

**Figure S1.** Effects of nicotinic acid (NA) on the senescence associated- $\beta$  galactosidase (SA- $\beta$ G) activity. Hs68 cells were serially cultured in the medium containing 0, 0.25, 0.5, 1 and 3 mM of NA. On day 91 of the serial culture, SA- $\beta$ G activities were measured by the double-substrate method, and representative results from X-Gal staining were shown.

**Table S1.** Effect of nicotinic acid (NA) on the lifespan of *C. elegans*.

|                   | Mean<br>lifespan<br>(day) | Median<br>lifespan<br>(day) | Maximum<br>lifespan<br>(day) | <i>P</i> value <sup>#</sup> |
|-------------------|---------------------------|-----------------------------|------------------------------|-----------------------------|
| Control           | 12.6 $\pm$ 4.3            | 12                          | 22                           |                             |
| NA 100 nmol/plate | 13.7 $\pm$ 4.3            | 14                          | 22                           | 0.192                       |
| NA 200 nmol/plate | 13.6 $\pm$ 4.7            | 14                          | 24                           | 0.146                       |
| NA 600 nmol/plate | 14.8 $\pm$ 4.7            | 16                          | 24                           | 0.003                       |

<sup>#</sup>*P* values when compared to the control group by log-rank test.

Values for the mean lifespan were presented with mean  $\pm$  SD, n = 90 for each group.

**Table S2.** Effect of nicotinic acid (NA) on the lifespan of *sir-2.1* mutants.

|                                       | Mean<br>lifespan<br>(day) | Median<br>lifespan<br>(day) | Maximum<br>lifespan<br>(day) | <i>P</i> value <sup>#</sup> |
|---------------------------------------|---------------------------|-----------------------------|------------------------------|-----------------------------|
| Control <i>sir-2.1</i>                | 11.7 $\pm$ 4.0            | 10                          | 20                           |                             |
| <i>sir-2.1</i> +<br>NA 600 nmol/plate | 11.8 $\pm$ 4.7            | 12                          | 20                           | 0.698                       |

<sup>#</sup>*P* value when compared to the control group by log-rank test.

Values for the mean lifespan were presented with mean  $\pm$  SD, n = 90 for each group.

**Table S3.** Effect of nicotinic acid (NA) on the lifespan of *pme-1* mutants.

|                                     | Mean<br>lifespan<br>(day) | Median<br>lifespan<br>(day) | Maximum<br>lifespan<br>(day) | P value <sup>#</sup> |
|-------------------------------------|---------------------------|-----------------------------|------------------------------|----------------------|
| Control <i>pme-1</i>                | 13.8 ± 4.6                | 14                          | 24                           |                      |
| <i>pme-1</i> +<br>NA 600 nmol/plate | 15.2 ± 4.4                | 16                          | 24                           | 0.086                |

<sup>#</sup>P value when compared to the control group by log-rank test.

Values for the mean lifespan were presented with mean ± SD, n = 90 for each group.

**Table S4.** Effects of nicotinic acid (NA) on the lifespan of wild-type *C. elegans* grown on the NGM plates pretreated with NAD<sup>+</sup>.

|                                                        | Mean<br>lifespan<br>(day) | Median<br>lifespan<br>(day) | Maximum<br>lifespan<br>(day) | P <sub>1</sub> <sup>#</sup> | P <sub>2</sub> <sup>&amp;</sup> |
|--------------------------------------------------------|---------------------------|-----------------------------|------------------------------|-----------------------------|---------------------------------|
| Control                                                | 12.2 ± 4.3                | 12                          | 20                           |                             |                                 |
| Pre-add NAD <sup>+</sup> 100 μM                        | 15.4 ± 4.9                | 16                          | 24                           | <0.001                      |                                 |
| Pre-add NAD <sup>+</sup> 100 μM<br>+ NA 600 nmol/plate | 15.9 ± 4.9                | 16                          | 26                           | <0.001                      | 0.543                           |

<sup>#</sup> P<sub>1</sub> values when compared to the control group by log-rank test.

<sup>&</sup>P<sub>2</sub> value when compared between “Pre-add NAD<sup>+</sup> 100 μM” and “Pre-add NAD<sup>+</sup> 100 μM + NA 600 nmol/plate” groups by log-rank test.

Values for the mean lifespan were presented with mean ± SD, n = 90 for each group.
